# Supplementary material
Source: publisher figshare collection journal article supplement (https://acs.figshare.com/ndownloader/files/29093349)
Supplement: Supplementary file 1 [file 29093349]

# **Supporting Information**

## **Simultaneous Enhancement of Charge Separation and Hole Transportation in a W: $\alpha$ -Fe<sub>2</sub>O<sub>3</sub>/MoS<sub>2</sub> Photoanode: The Collaborative Approach of MoS<sub>2</sub> as a Heterojunction and W as Metal Doping**

Zohreh Masoumi<sup>1</sup>, Meysam Tayebi<sup>1</sup>, Morteza Kolaei<sup>1</sup>, Ahmad Tayyebi<sup>2</sup>, Hongsun Ryu<sup>3</sup> and Joon I. Jang<sup>3</sup>

Byeong-Kyu Lee<sup>1,\*</sup>

<sup>1</sup>Department of Civil and Environment Engineering, University of Ulsan, Daehakro 93, Namgu, Ulsan 44610, Republic of Korea

<sup>2</sup>Department of Energy Engineering, School of Energy and Chemical Engineering, Ulsan National Institute of Science and Technology (UNIST), 50 UNIST-gil, Ulsan, 44919, Republic of Korea

<sup>3</sup>Department of Physics, Sogang University, 35 Baekbeom-ro, Mapo-gu, Seoul, 04107 South Korea

\*Corresponding author: ([bklee@ulsan.ac.kr](mailto:bklee@ulsan.ac.kr))

### **Contents of Supplementary**

1. Characterization Equipment
2. Calculation of parameters for MoS<sub>2</sub> nanosheets
3. SEM and EDX of W doped samples
4. HRTEM, FFT, and IFFT for crystal structure
5. XPS survey spectra for  $\alpha$ -Fe<sub>2</sub>O<sub>3</sub>, 0.5W: $\alpha$ -Fe<sub>2</sub>O<sub>3</sub>, 0.5W: $\alpha$ -Fe<sub>2</sub>O<sub>3</sub>/MoS<sub>2</sub>
6. Optical analysis for W doped samples
7. XPS depth profile of W4f for 0.5W:  $\alpha$ -Fe<sub>2</sub>O<sub>3</sub> photoanode
8. EPR for detect the defects in the W:  $\alpha$ -Fe<sub>2</sub>O<sub>3</sub> samples
9. PEC performance of W doped samples
10. Calculation of  $V_{fb}$ ,  $N_D$  and  $W_{scI}$  values
11. The relationship of  $V_{fb}$  and  $N_D$  vs. percentage of W doped on  $\alpha$ -Fe<sub>2</sub>O<sub>3</sub> nanorods
12. The PEC performance for optimized  $\alpha$ -Fe<sub>2</sub>O<sub>3</sub>/MoS<sub>2</sub>
13. The LSV and chopped LSV for optimized all of W: $\alpha$ -Fe<sub>2</sub>O<sub>3</sub>/MoS<sub>2</sub>
14. LSV for comparison the photocurrent density vs. potential
15. Calculation of  $\tau$  value in TRPL
16. Calculation of  $\eta_{inj}$  and  $\eta_{sep}$  values
17. The Energy band diagram from UPS
18. Calculation of geometry of nanorods
19. Hydrogen and Oxygen Evolution Measurement
20. Recently reported doped hematite photoanodes with/without heterojunction

## 1. Characterization Equipment

The morphologies and structures of the samples were characterized by using scanning electron microscopy (SEM, Model Quanta 250 FEG) and transmission electron microscopy (TEM, JEOL, JEM-2100F). The structures and crystallinities of the different catalytic films were characterized by X-ray diffraction (XRD). The X-ray source was Bruker D8Advance with monochromatic Cu K $\alpha$  radiation ( $\lambda=1.5406$  Å) in the  $2\theta$  range of 10–55°. A Raman spectrum was used with the laser line at 785 nm as the excitation source at room temperature (Bruker, model: Senterra 2009, Germany). The chemical states of the component elements in the film samples were investigated using Thermo Scientific Sigma Probe spectrometer with a monochromatic AlK $\alpha$  source (photon energy 1486.6 eV), spot size of 400  $\mu\text{m}$ , energy step size of 1.0 eV and pass energy of 200 eV. The optical properties of the photoanodes were measured by Perkin Elmer UV-Vis-NIR model Lambda 950. Finally, photoluminescence (PL) spectra were detected at room temperature using an Edinburgh F-4600 NF900 (FLS920) fluorescence spectrophotometer at an excitation of 400 nm. Electron paramagnetic resonance (EPR) measurements in the X-band (9.64 GHz) were performed using a CW/Pulse EPR System(QM09). The power 1 mW absorbed by the samples was recorded at room temperature. To measure the time-resolved photoluminescence (TRPL), we used the second harmonic generated beam of a Ti:sapphire laser (800 nm wavelength, 100 fs pulse-width, and 82 MHz repetition rate). The collected luminescence signal was dispersed by a monochromator (MS3504i, SOLAR TII) then detected by a photomultiplier tube (PMT-100, Becker & Hickl). The luminescence signal from the photomultiplier tube was processed by time-correlated single-photon counting (TCSPC) system (SPC-730, Becker & Hickl) to yield the temporal behavior of FTOs and hematite-based samples. The monitoring window for the TRPL measurements was 590 nm and 469 nm for FTOs and  $\alpha\text{-Fe}_2\text{O}_3$  s, respectively and the excitation intensity was about 4.7 MW/cm<sup>2</sup>.

## 2. Calculation of parameters for MoS<sub>2</sub> nanosheets

The concentration (C<sub>M</sub>), length (L), and thickness (N) of the exfoliated MoS<sub>2</sub> nanosheets was estimated by eq. S1, S2, and S3.

$$L(\text{nm}) = \frac{(3500 \times \frac{EXT_B}{EXT_{345}} - 140)}{(11.5 - \frac{EXT_B}{EXT_{345}})} \quad (\text{S1})$$

$$C (\text{mg. mL}^{-1}) = EXT_{345}/(\alpha \times l) \quad (\text{S2})$$

$$\text{Thickness (N (nm))} = 2.3 \times 10^{36} \times \exp(-54888/\lambda_A) \quad (\text{S3})$$

In equation S1, L is average size of nanosheets were estimated by EXT<sub>B</sub> and EXT<sub>345</sub> values in UV-vis data.

Concentration of the nanosheets in equation S2, depends on EXT<sub>345</sub> value, the absorption coefficient (α), and the path length (l).

The equation S3 includes the wavelength of the absorbance light at A point (λ<sub>A</sub>) which can be found in the UV-vis data (Fig.1a).

### 3. SEM and EDX of W doped samples

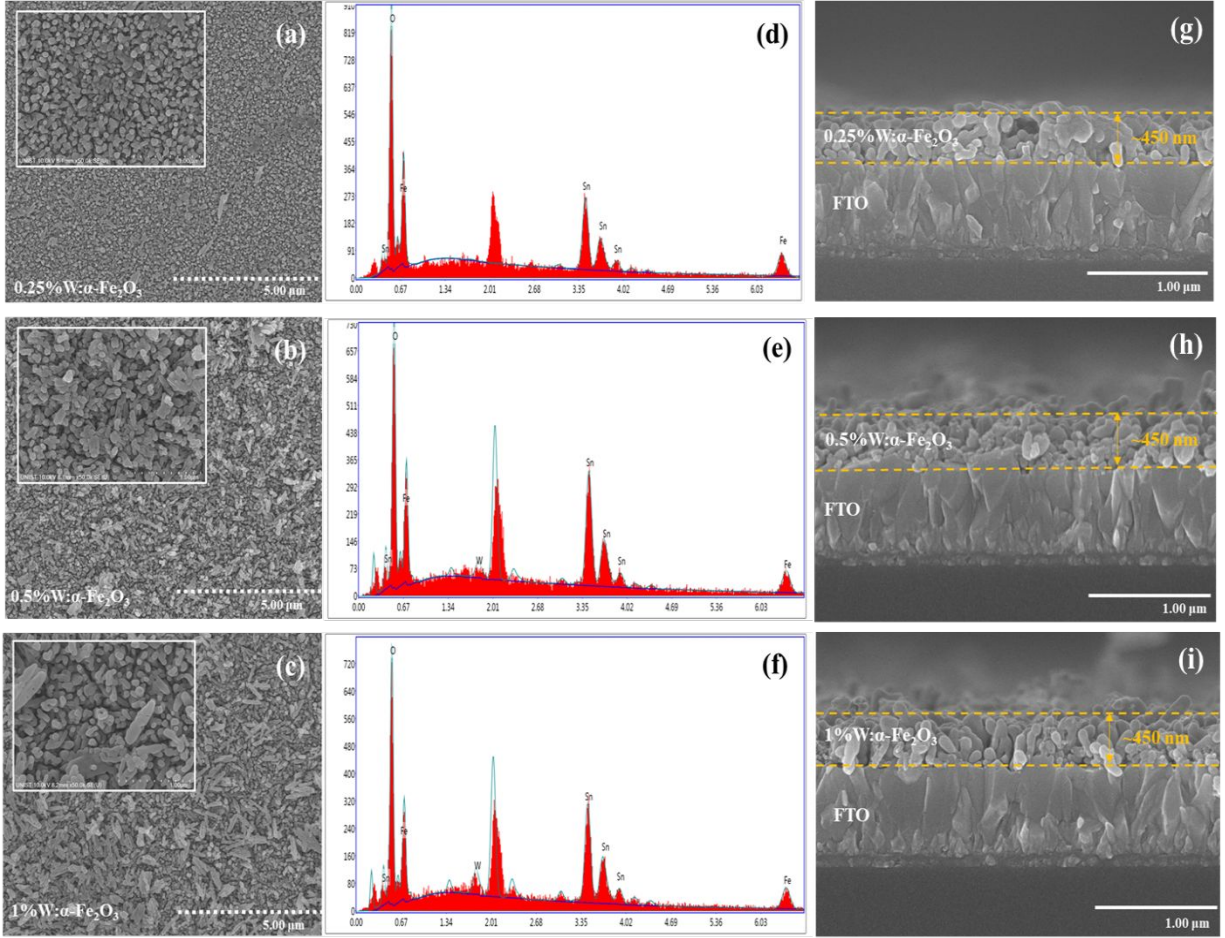

Fig. S1. (a-c) Top-view, (d-f) EDX, and (g-i) cross section of 0.25W: $\alpha\text{-Fe}_2\text{O}_3$ , 0.5W: $\alpha\text{-Fe}_2\text{O}_3$ , and 1W: $\alpha\text{-Fe}_2\text{O}_3$  electrodes.

#### 4. HRTEM and FFT for crystal structure

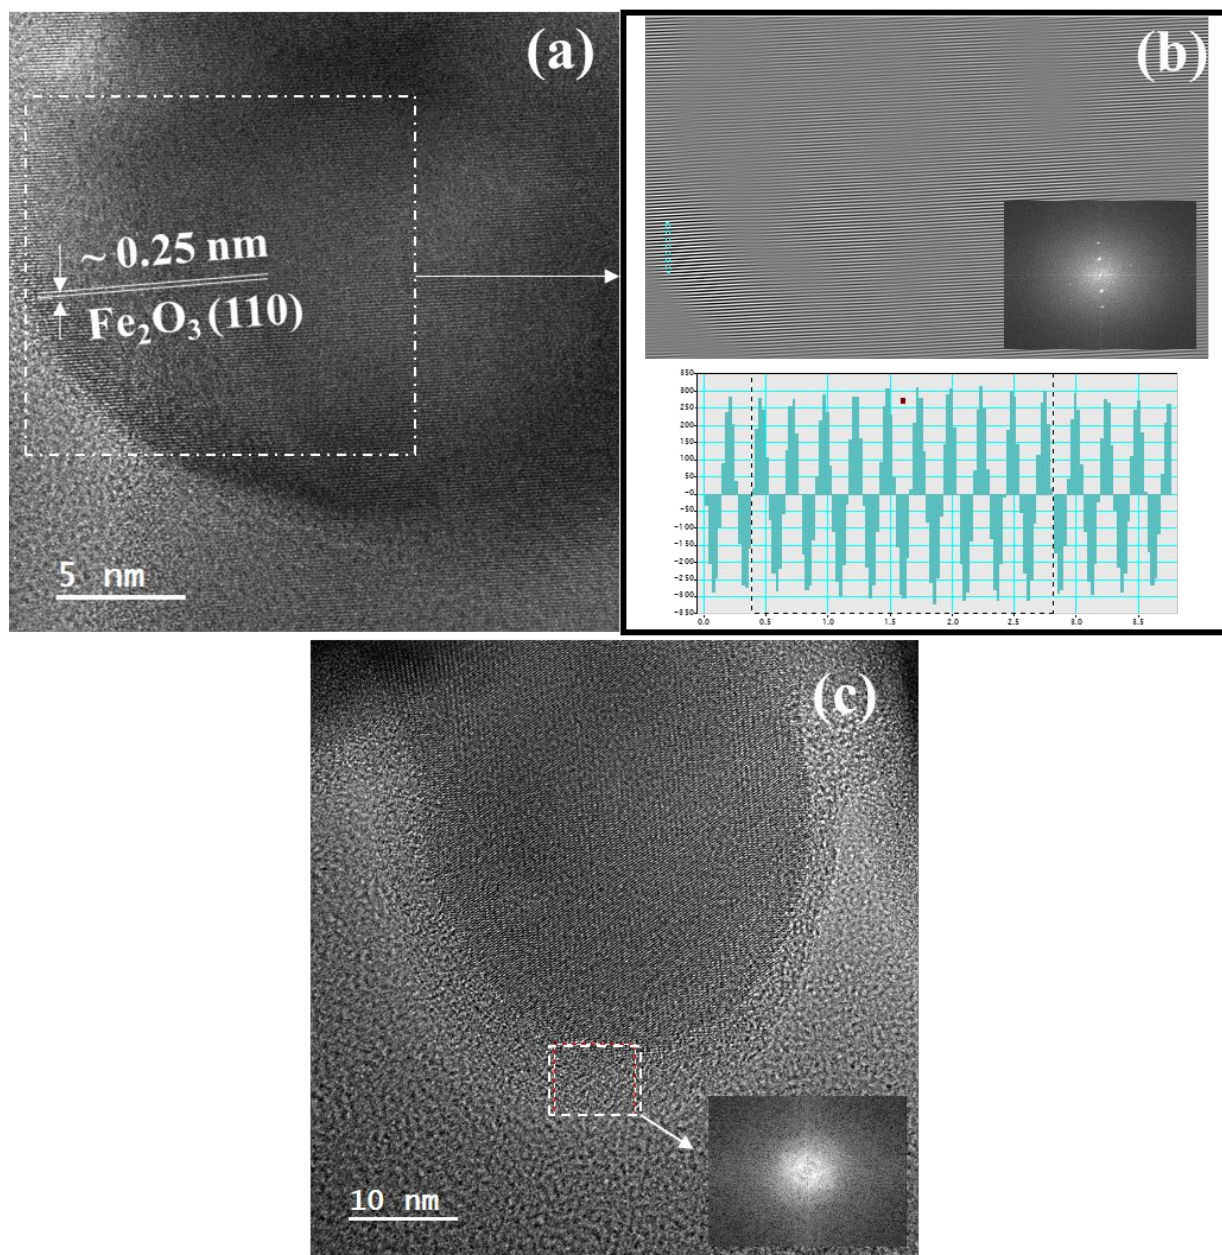

Fig. S2. (a) HRTEM image of 0.5W:α-Fe<sub>2</sub>O<sub>3</sub>, (b) FFT, inverse FFT, and profile of inverse FFT images of 0.5W:α-Fe<sub>2</sub>O<sub>3</sub>, and (c) HRTEM image of 0.5W:α-Fe<sub>2</sub>O<sub>3</sub>/MoS<sub>2</sub> with FFT of MoS<sub>2</sub> layer.

5. XPS survey spectra for  $\alpha$ -Fe<sub>2</sub>O<sub>3</sub>, 0.5W: $\alpha$ -Fe<sub>2</sub>O<sub>3</sub>, 0.5W: $\alpha$ -Fe<sub>2</sub>O<sub>3</sub>/MoS<sub>2</sub>

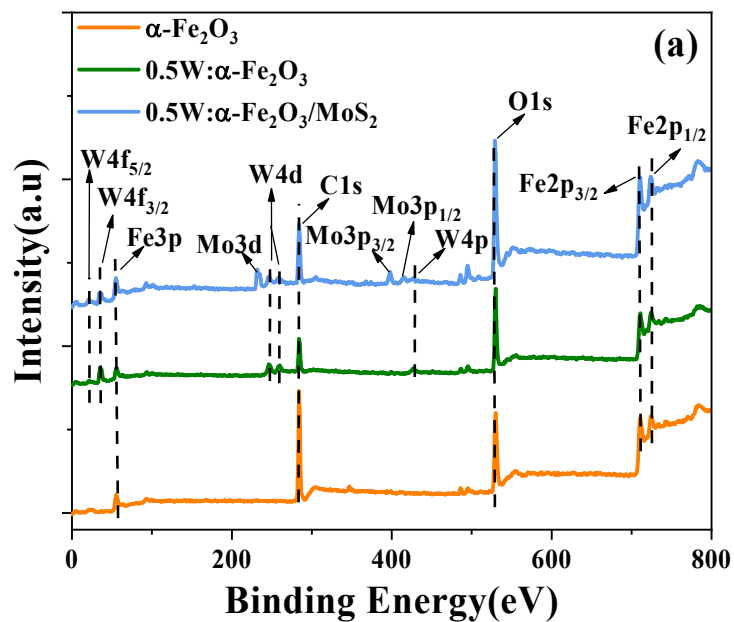

Fig. S3. XPS survey spectra for pure  $\alpha$ -Fe<sub>2</sub>O<sub>3</sub>, 0.5W: $\alpha$ -Fe<sub>2</sub>O<sub>3</sub>, 0.5W: $\alpha$ -Fe<sub>2</sub>O<sub>3</sub>/MoS<sub>2</sub>.



## 6. Optical analysis for W doped samples

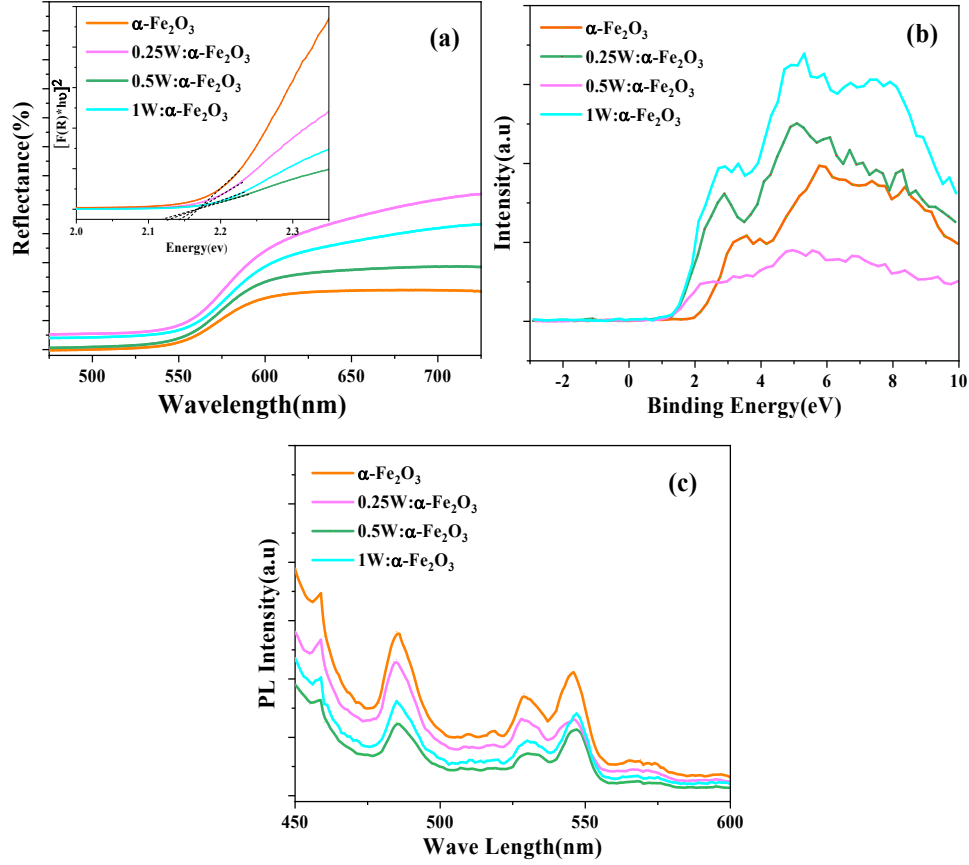

Fig. S4. (a) UV-vis reflectance spectra and band gap energies, (b) XPS for VB, and (c) PL of pure  $\alpha\text{-Fe}_2\text{O}_3$ , 0.25W: $\alpha\text{-Fe}_2\text{O}_3$ , 0.5W: $\alpha\text{-Fe}_2\text{O}_3$ , and 1W: $\alpha\text{-Fe}_2\text{O}_3$ .

The Tauc equation for direct bandgap thus, can be expressed as in below equation<sup>1</sup>,

$$(\alpha \cdot hv) = A(hv - E_g)^{1/2}$$

where  $hv$  is photon energy,  $E_g$  and  $A$  is a proportionality constant.

The reflectance is converted into absorption coefficient by using the Kubelka-Munk (K-M) or remission function  $F(R_\infty)$ , which gives the final relation equation<sup>1</sup>:

$$(F(R) \cdot hv) = A(hv - E_g)^{1/2}$$

where  $hv$  is photon energy,  $F(R)$  is the reflectance of the sample  $E_g$ , and  $A$  is a proportionality constant.

As shown in Fig. S4a, the band gap for  $\alpha\text{-Fe}_2\text{O}_3$  decreased after doping W from 2.16 to 2.11 eV. The W: $\alpha\text{-Fe}_2\text{O}_3$  samples could absorb more photons than the pristine  $\alpha\text{-Fe}_2\text{O}_3$  sample could, and

therefore generated more electron-hole pairs. This confirms the improved PEC efficiency under higher wave number (low energy) of visible light irradiation compared with that of pure  $\alpha\text{-Fe}_2\text{O}_3$ .

### 7. XPS depth profile of the 0.5W: $\alpha\text{-Fe}_2\text{O}_3$

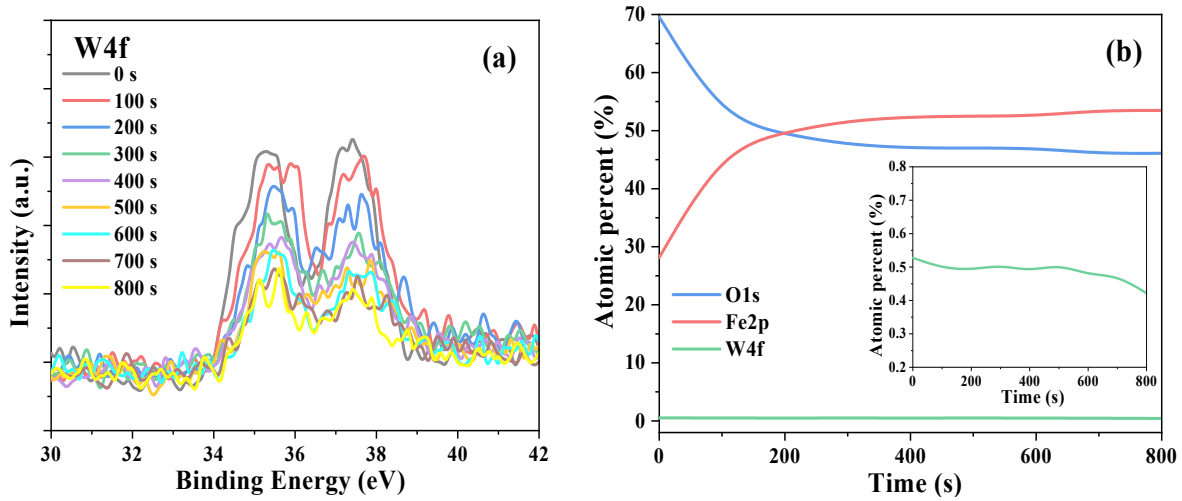

Fig. S5. (a) XPS depth profiles of W4f in different etching times and (b) XPS depth profiles of W4f, Fe2p, and O1s in the 0.5W:  $\alpha\text{-Fe}_2\text{O}_3$  photoanode.



## 8. The EPR for detect the defects in the W: $\alpha$ -Fe<sub>2</sub>O<sub>3</sub> samples

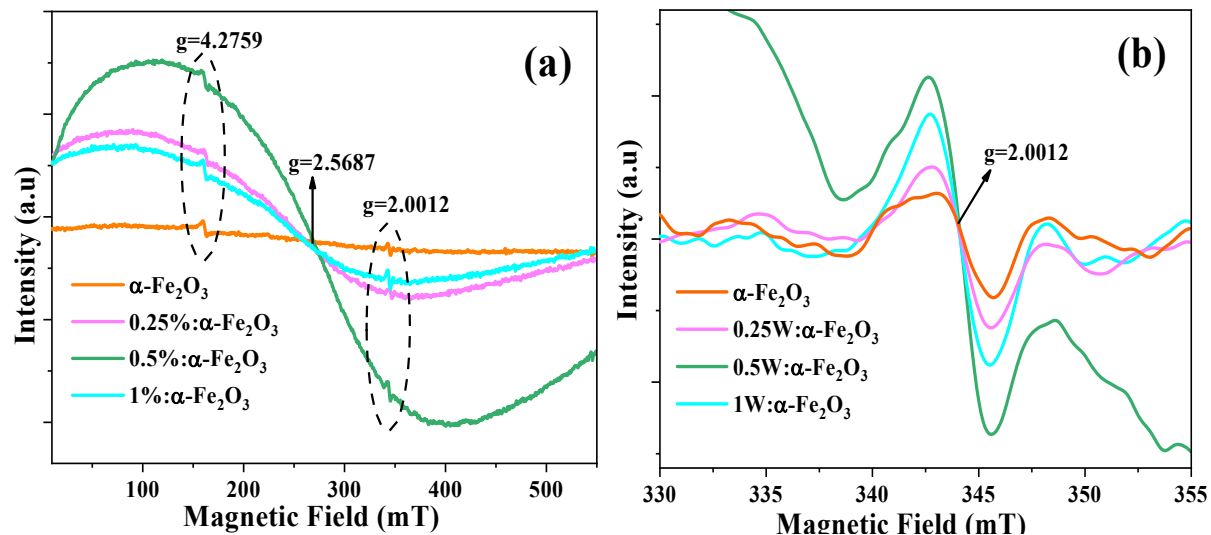

Fig. S6. Electron paramagnetic resonance (EPR) spectra of the pure  $\alpha$ -Fe<sub>2</sub>O<sub>3</sub>, 0.25W: $\alpha$ -Fe<sub>2</sub>O<sub>3</sub>, 0.5W: $\alpha$ -Fe<sub>2</sub>O<sub>3</sub>, and 1W: $\alpha$ -Fe<sub>2</sub>O<sub>3</sub> photoanodes.

The EPR results of  $\alpha$ -Fe<sub>2</sub>O<sub>3</sub>, 0.25W: $\alpha$ -Fe<sub>2</sub>O<sub>3</sub>, 0.5W: $\alpha$ -Fe<sub>2</sub>O<sub>3</sub>, and 1W: $\alpha$ -Fe<sub>2</sub>O<sub>3</sub> photoelectrode are shown in Fig. S5. It can be easily seen that the g-values of all sample spectra are the same whereas the peak intensities are enhanced for the W doped  $\alpha$ -Fe<sub>2</sub>O<sub>3</sub> electrodes. The peak intensity of the EPR spectrum is correlated with the concentration of Fe<sup>3+</sup> and Fe<sup>2+</sup> ions, which implies that more oxygen vacancies were produced by the doping process of the tungsten.

## 9. PEC performance of W doped samples

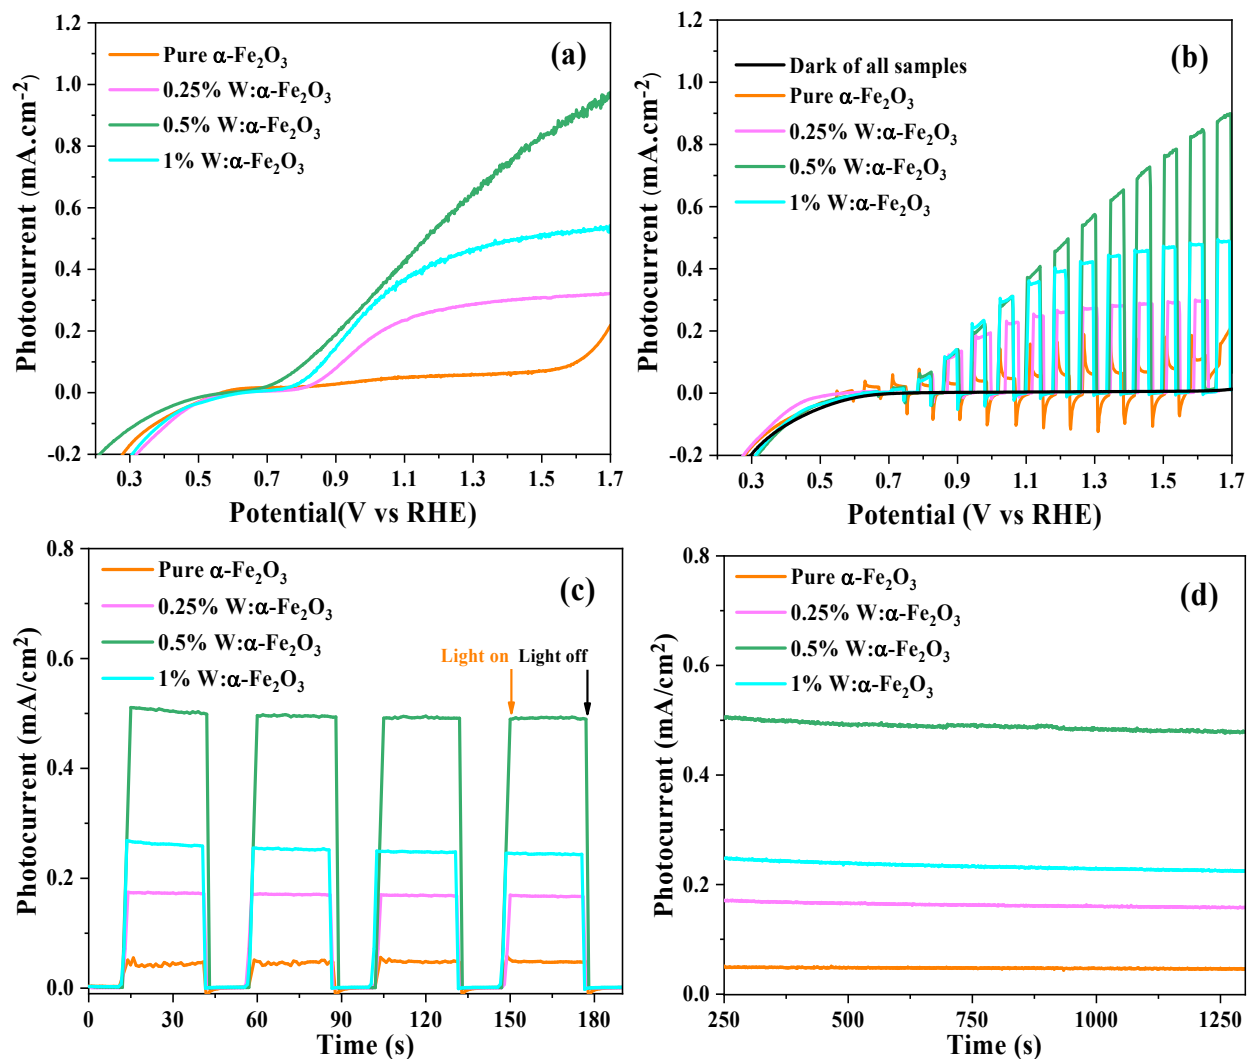

Fig. S7. (a) Linear scan voltammetry and (b) chopped LSV vs. potential linear from 0.3 to 1.5 V vs. RHE, (c) photocurrent response, and (d) photocurrent stability at 1.23 V vs. RHE for pure  $\alpha\text{-Fe}_2\text{O}_3$ , 0.25W: $\alpha\text{-Fe}_2\text{O}_3$ , 0.5W: $\alpha\text{-Fe}_2\text{O}_3$ , and 1W: $\alpha\text{-Fe}_2\text{O}_3$  under  $100\text{ mWcm}^{-2}$  illumination. The electrolyte was a 1 M NaOH.

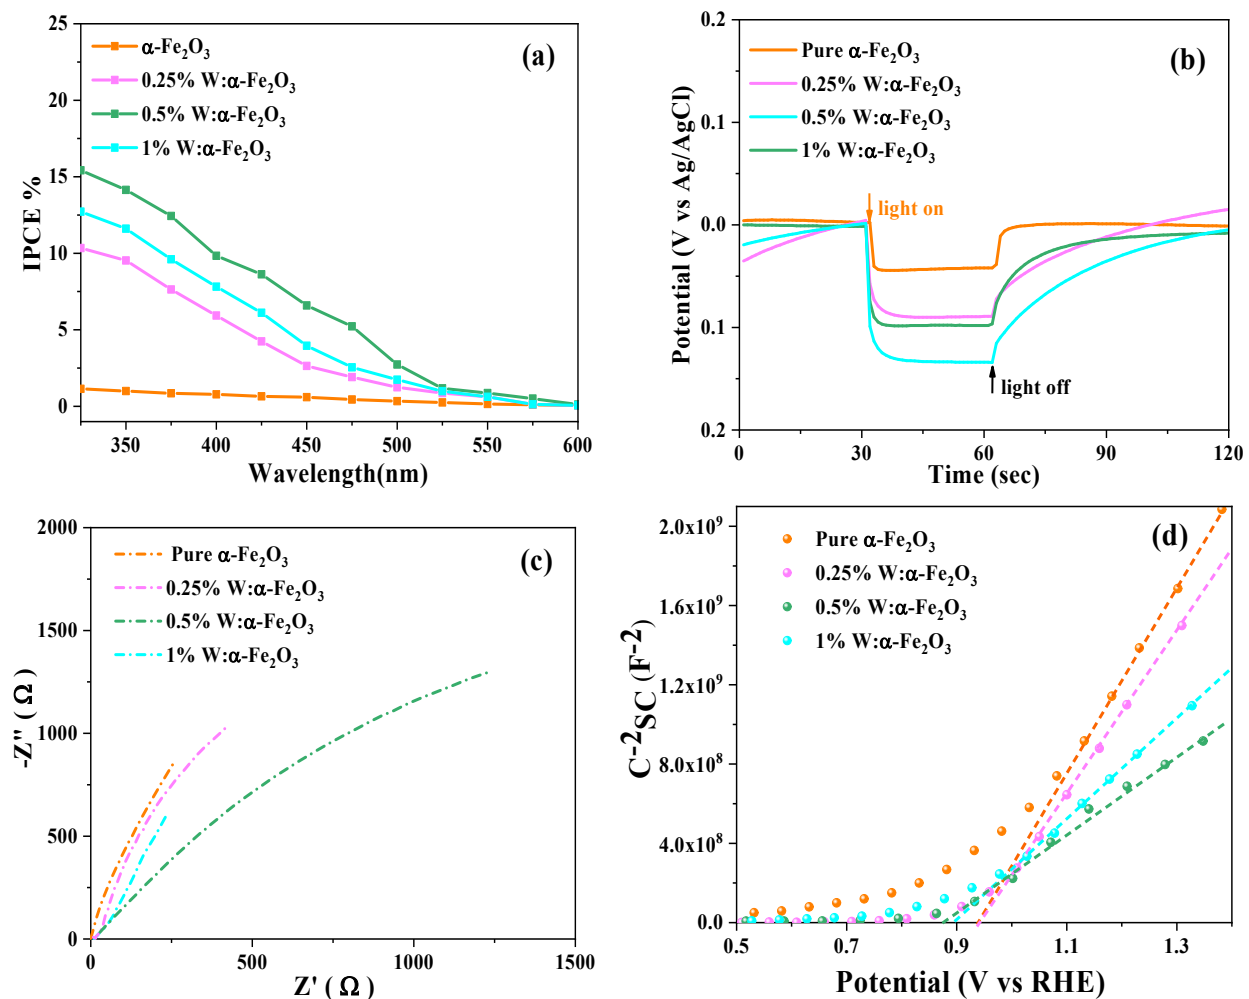

Fig. S8. (a) The incident-photon-to-current-efficiencies (IPCE), (b) change in open circuit potential ( $\Delta\text{OCP}$ ) value, (c) Nyquist plot, and . Mott-Schottky analysis for pure  $\alpha\text{-Fe}_2\text{O}_3$ , 0.25W:  $\alpha\text{-Fe}_2\text{O}_3$ , 0.5W:  $\alpha\text{-Fe}_2\text{O}_3$ , and 1W:  $\alpha\text{-Fe}_2\text{O}_3$  under 100 mWcm<sup>-2</sup> illumination. The supporting electrolyte was a 1 M aqueous solution of NaOH.

## 10. Calculation of $V_{fb}$ , $N_D$ and $W_{scl}$ values

The  $V_{fb}$ ,  $N_D$  and  $W_{scl}$  values of photoanodes were calculated with equations (S4):

$$\begin{aligned} \frac{1}{C^2} &= \frac{2}{\epsilon\epsilon_0 A^2 e N_D} \left( V - V_{fb} - \frac{K_B T}{e} \right) & \epsilon &= 25 \text{ for } \alpha - Fe_2O_3 & (S4) \\ Slope &= \frac{2}{\epsilon\epsilon_0 A^2 e N_D} \rightarrow N_D = \frac{2}{\epsilon\epsilon_0 A^2 e (Slope)} & \epsilon_0 &= 8.854 * 10^{-12} F.m^{-1} \\ V_{fb} &= \text{intercept} - \frac{K_B T}{e} \rightarrow \text{intercept} = V_{fb} + \frac{K_B T}{e} & e &= 1.6 * 10^{-19} C \\ & & K_B &= 1.381 * 10^{-23} J.K^{-1} \\ & & T &= 298 K \end{aligned}$$

where  $V$  is the CB potential (V),  $V_{fb}$  the flat band potential (V),  $k$  the Boltzmann constant,  $T$  the temperature (K),  $e$  the charge of an electron (C),  $\epsilon$  the relative permittivity,  $\epsilon_0$  the dielectric constant,  $N_D$  the donor concentration per unit volume ( $cm^3$ ), and  $C_{sc}$  the surface charge capacitance ( $F/cm^2$ ). We can obtain qualitative information on donor concentration based on the Mott–Schottky plot in which the positive slopes of the electrodes indicate n-type semiconductors. The width of the space charge layer ( $W_{SCL}$ ) can be obtained by solving Poisson's equation, using equation (S5).

$$W_{SCL} = \sqrt{\frac{2\epsilon\epsilon_0 (V - V_{fb})}{e N_D}} \quad (S5)$$

**Table S1:**  $V_{fb}$ ,  $N_D$  and  $W_{scl}$  values of W doped  $\alpha$ - $Fe_2O_3$  with different atomic percentage

| Sample                      | slope    | Intercept (X axis) | $N_D (cm^{-3})$ | $V_{fb} (V)$ | $W_{scl} (nm)$ |
|-----------------------------|----------|--------------------|-----------------|--------------|----------------|
| $\alpha$ - $Fe_2O_3$        | 5.13E+09 | 0.94               | 2.75E+20        | 0.91         | 4.64           |
| 0.25W: $\alpha$ - $Fe_2O_3$ | 4.98E+09 | 0.94               | 2.83E+20        | 0.91         | 4.57           |
| 0.5W: $\alpha$ - $Fe_2O_3$  | 2.80E+09 | 0.87               | 5.04E+20        | 0.84         | 3.37           |
| 1W: $\alpha$ - $Fe_2O_3$    | 2.86E+09 | 0.89               | 4.94E+20        | 0.86         | 3.43           |

**Table S2:**  $V_{fb}$ ,  $N_D$  and  $W_{scl}$  values for  $\alpha$ - $Fe_2O_3$ , 0.5W: $\alpha$ - $Fe_2O_3$  and 0.5W: $\alpha$ - $Fe_2O_3$ /MoS<sub>2</sub>

| Sample                                       | slope    | Intercept (X axis) | $N_D (cm^{-3})$ | $V_{fb} (V)$ | $W_{scl} (nm)$ |
|----------------------------------------------|----------|--------------------|-----------------|--------------|----------------|
| $\alpha$ - $Fe_2O_3$                         | 5.13E+09 | 0.94               | 2.75E+20        | 0.91         | 4.64           |
| 0.5W: $\alpha$ - $Fe_2O_3$                   | 2.80E+09 | 0.87               | 5.04E+20        | 0.84         | 3.37           |
| 0.5W: $\alpha$ - $Fe_2O_3$ /MoS <sub>2</sub> | 2.37E+09 | 0.84               | 5.97E+20        | 0.81         | 3.08           |

# 11. The relationship between of $V_{fb}$ and $N_D$ vs. percentage of W doped

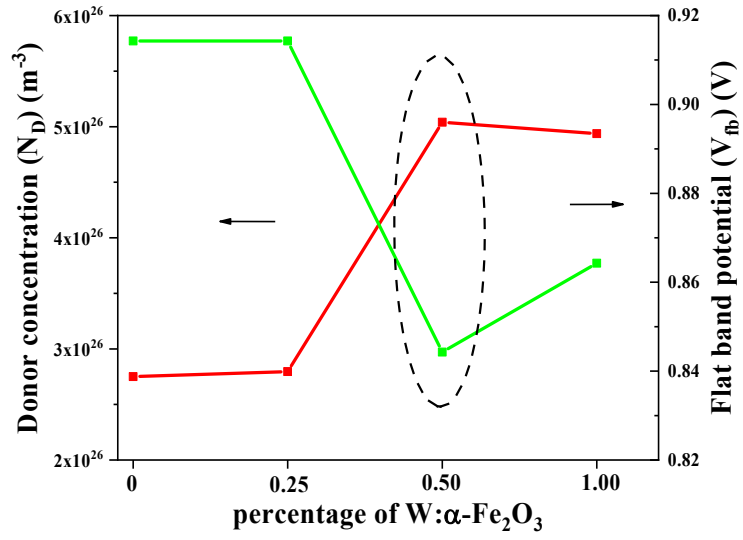

Fig. S9. The relationship between Donor concentration ( $N_D$ ) and  $V_{fb}$

## 12. The PEC performance for optimized $\alpha$ -Fe<sub>2</sub>O<sub>3</sub>/MoS<sub>2</sub>

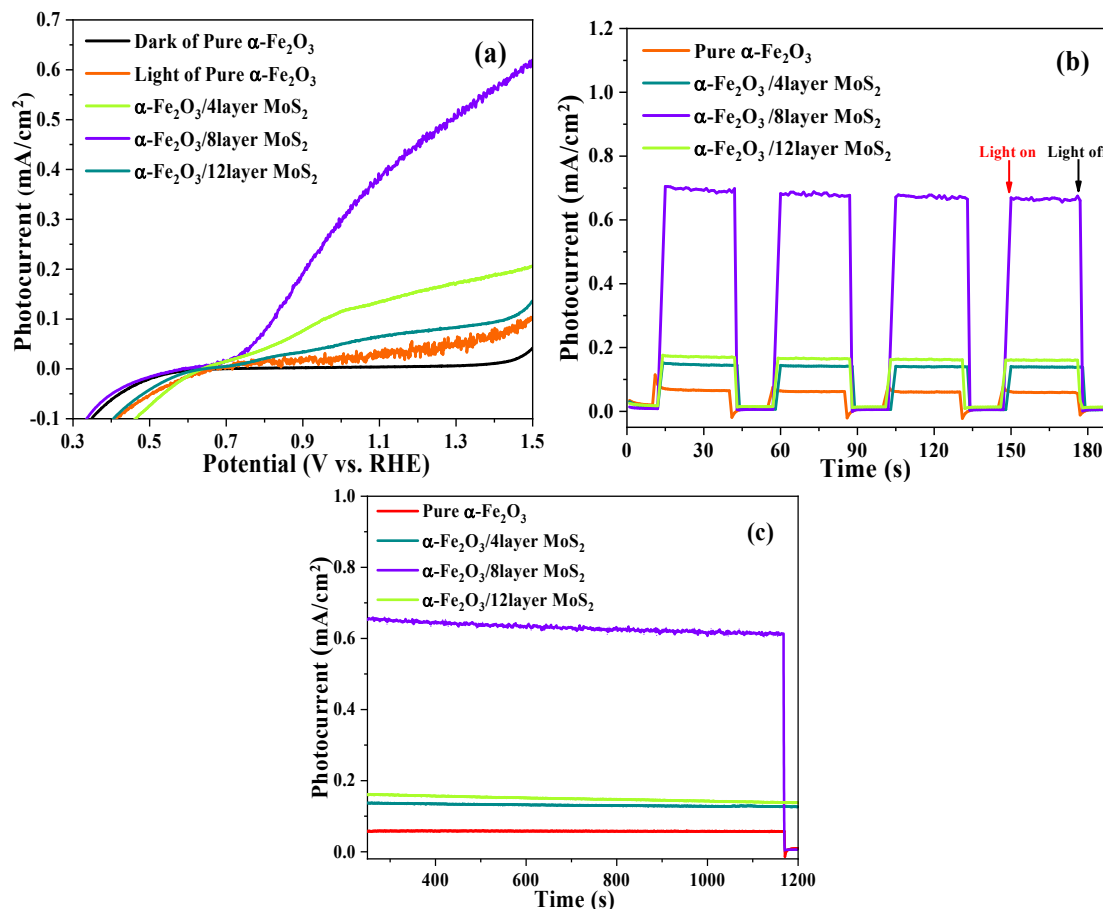

Fig. S10. (a) LSV, (b) photocurrent response, (c) photocurrent stability for pure  $\alpha$ -Fe<sub>2</sub>O<sub>3</sub>,  $\alpha$ -Fe<sub>2</sub>O<sub>3</sub>/4layer MoS<sub>2</sub>,  $\alpha$ -Fe<sub>2</sub>O<sub>3</sub>/8layer MoS<sub>2</sub>, and  $\alpha$ -Fe<sub>2</sub>O<sub>3</sub>/12layer MoS<sub>2</sub> under 100 mWcm<sup>-2</sup> illumination in 1 M NaOH.

The LSV of the  $\alpha$ -Fe<sub>2</sub>O<sub>3</sub>,  $\alpha$ -Fe<sub>2</sub>O<sub>3</sub>/4layer MoS<sub>2</sub>,  $\alpha$ -Fe<sub>2</sub>O<sub>3</sub>/8layer MoS<sub>2</sub>, and  $\alpha$ -Fe<sub>2</sub>O<sub>3</sub>/12layer MoS<sub>2</sub> electrodes were measured between 0.3 and 1.5 V vs. RHE, as shown in Fig. S11a. The photocurrent density significantly increased after the deposition of MoS<sub>2</sub> nanosheets with the highest value of 0.7 mA.cm<sup>-2</sup> at 1.5 V vs. RHE for  $\alpha$ -Fe<sub>2</sub>O<sub>3</sub>/8layer MoS<sub>2</sub>. Chronoamperometry scans for 4 cycles (Fig. S11b), measured under intermittent irradiation (30 min light on and 15 min light off) confirm the photocurrent responses. The fast and uniform reactions to each light on/off interval of the electrodes reflect the good producibility of the samples. As shown in Fig. S11c, the photocurrent stabilities of different  $\alpha$ -Fe<sub>2</sub>O<sub>3</sub>/MoS<sub>2</sub> films were obtained by continuous illumination after 10 on-off cycles. The photoelectrodes showed stable photocurrent, even in 15-min light illumination, without a significant downturn. These behaviors may possibly be attributable to the heterojunction between MoS<sub>2</sub> and  $\alpha$ -Fe<sub>2</sub>O<sub>3</sub>, which improved the charge separation and reduced the recombination of photogenerated electrons and holes<sup>2</sup>. Therefore, the optimum concentration of MoS<sub>2</sub> on the surface of each electrode is 800 mL (8times×each time amount (100ml)) which loaded on the optimum W doped  $\alpha$ -Fe<sub>2</sub>O<sub>3</sub> electrodes.

### 13. The LSV and chopped LSV for optimized all of W: $\alpha$ -Fe<sub>2</sub>O<sub>3</sub>/MoS<sub>2</sub>

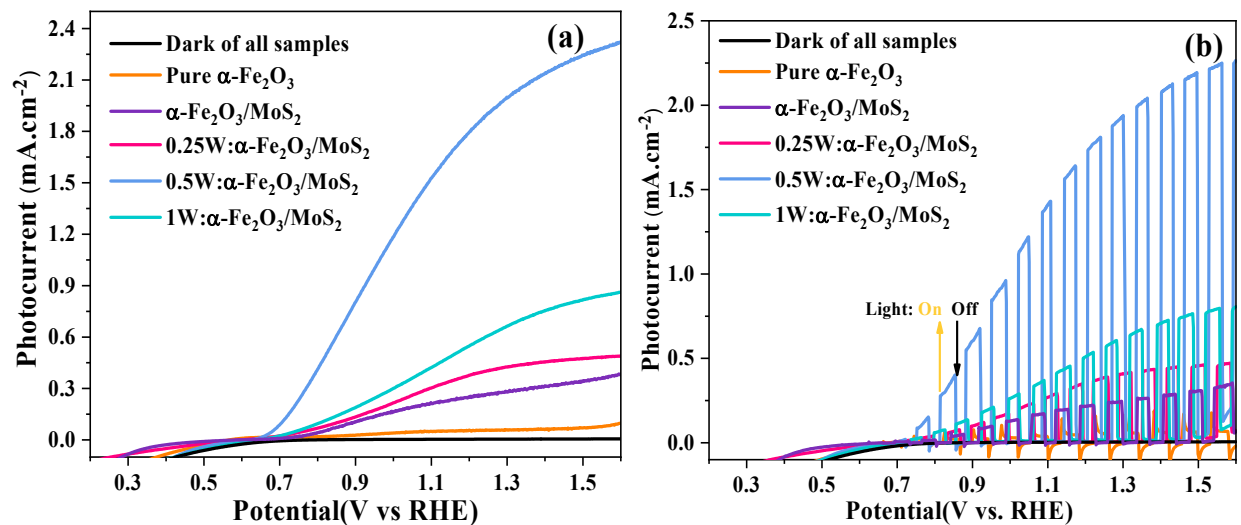

Fig. S11. (a)Linear scan voltammetry and (b)chopped LSV vs. potential from 0.3 to 1.5 V (vs. RHE) for pure  $\alpha$ -Fe<sub>2</sub>O<sub>3</sub>,  $\alpha$ -Fe<sub>2</sub>O<sub>3</sub>/MoS<sub>2</sub>, 0.25W: $\alpha$ -Fe<sub>2</sub>O<sub>3</sub>/MoS<sub>2</sub>, 0.5W: $\alpha$ -Fe<sub>2</sub>O<sub>3</sub>/MoS<sub>2</sub>, and 1W: $\alpha$ -Fe<sub>2</sub>O<sub>3</sub>/MoS<sub>2</sub> under 100 mWcm<sup>-2</sup> illumination. The electrolyte was a 1 M NaOH.



#### 14. LSV for comparison the photocurrent density vs. potential

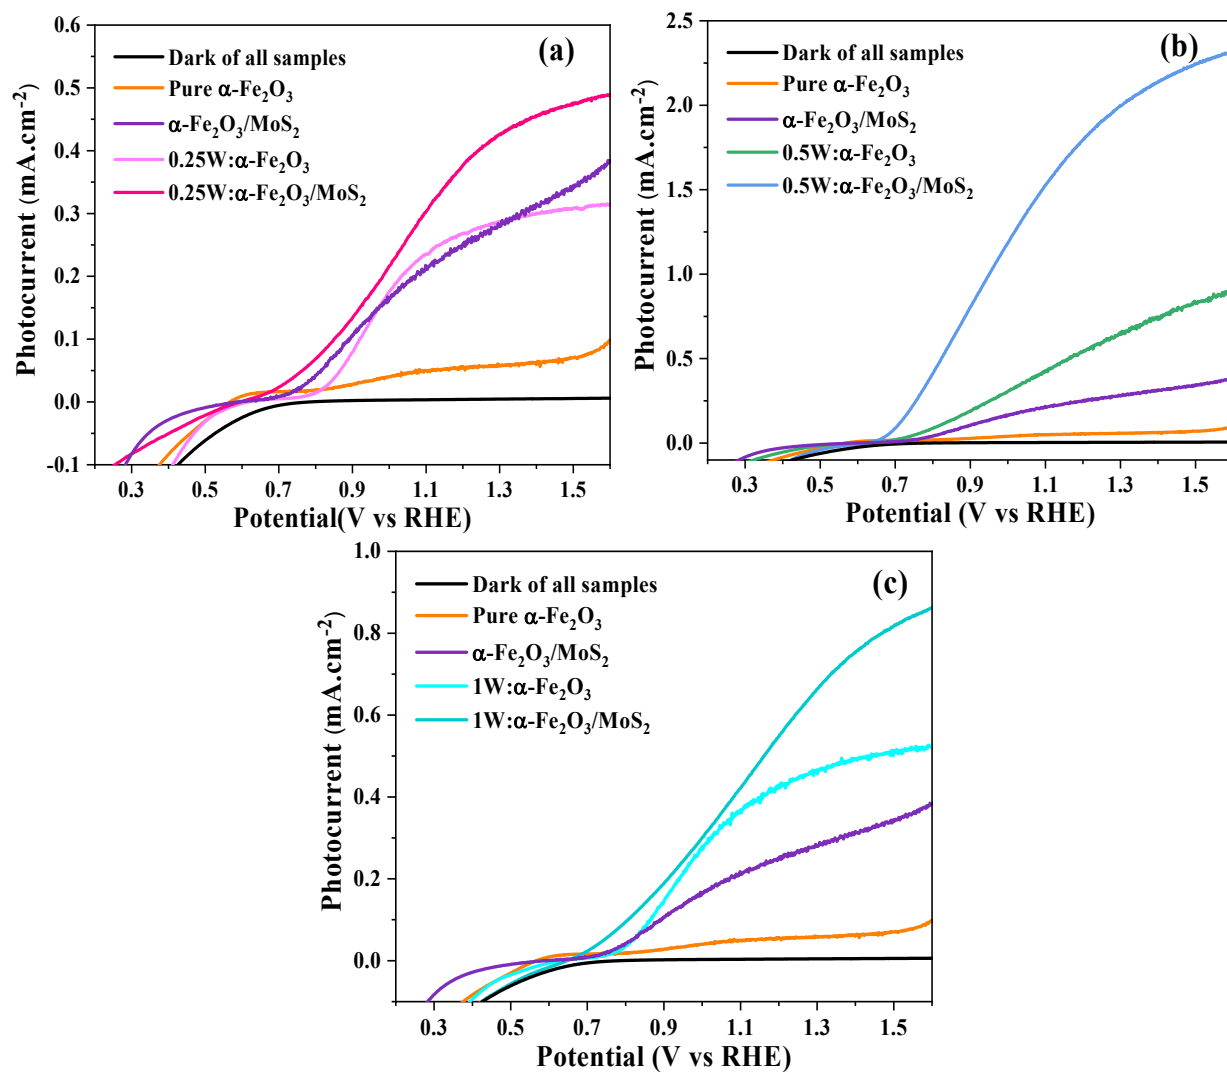

Fig. S12. Linear scan voltammetry (LSV) for comparison the photocurrent density vs. potential from 0.3 to 1.5 V (vs. RHE) of (a) pure  $\alpha$ -Fe<sub>2</sub>O<sub>3</sub>,  $\alpha$ -Fe<sub>2</sub>O<sub>3</sub>/MoS<sub>2</sub>, 0.25W: $\alpha$ -Fe<sub>2</sub>O<sub>3</sub>, and 0.25W: $\alpha$ -Fe<sub>2</sub>O<sub>3</sub>/MoS<sub>2</sub>, (b) pure  $\alpha$ -Fe<sub>2</sub>O<sub>3</sub>,  $\alpha$ -Fe<sub>2</sub>O<sub>3</sub>/MoS<sub>2</sub>, 0.5W: $\alpha$ -Fe<sub>2</sub>O<sub>3</sub>, and 0.5W: $\alpha$ -Fe<sub>2</sub>O<sub>3</sub>/MoS<sub>2</sub>, and (c) pure  $\alpha$ -Fe<sub>2</sub>O<sub>3</sub>,  $\alpha$ -Fe<sub>2</sub>O<sub>3</sub>/MoS<sub>2</sub>, 1W: $\alpha$ -Fe<sub>2</sub>O<sub>3</sub>, and 1W: $\alpha$ -Fe<sub>2</sub>O<sub>3</sub>/MoS<sub>2</sub> under 100 mWcm<sup>-2</sup> illumination. The electrolyte was a 1 M NaOH.

### 15. Calculation of $\tau$ value in TRPL

The time-resolved photoluminescence (TRPL) curves shown in Fig.6d in the manuscript, assess recombination kinetics of photoinduced electron-hole pairs. TRPL decay spectrum was fitted with a biexponential decay function displayed as Eq. (S6)<sup>3</sup>:

$$PL(t) = A_1 e^{-\frac{t}{\tau_1}} + A_2 e^{-\frac{t}{\tau_2}} + y_0 \quad (S6)$$

Where  $\tau_i$  is the decay time,  $K$  is a constant for the baseline offset, and  $A_i$  is the decay amplitude. The fitting parameters are summarized in Table S3. The average emission time also was calculated based on Eq. (S7)<sup>3</sup>:

$$\tau = \frac{A_1 \tau_1^2 + A_2 \tau_2^2}{A_1 \tau_1 + A_2 \tau_2} \quad (S7)$$

Table S3. Biexponential of the PL decay of pure  $\alpha$ -Fe<sub>2</sub>O<sub>3</sub>, 0.5W: $\alpha$ -Fe<sub>2</sub>O<sub>3</sub>, and 0.5W: $\alpha$ -Fe<sub>2</sub>O<sub>3</sub>/MoS<sub>2</sub>

| <b>Parameters</b><br><b>Samples</b> | <b><math>\alpha</math>-Fe<sub>2</sub>O<sub>3</sub></b> | <b>0.5W:<math>\alpha</math>-Fe<sub>2</sub>O<sub>3</sub></b> | <b>0.5W:<math>\alpha</math>-Fe<sub>2</sub>O<sub>3</sub>/MoS<sub>2</sub></b> |
|-------------------------------------|--------------------------------------------------------|-------------------------------------------------------------|-----------------------------------------------------------------------------|
| <b>y0</b>                           | 0.00                                                   | 0.01                                                        | 0.01                                                                        |
| <b>A<sub>1</sub></b>                | 0.07                                                   | 0.34                                                        | 0.23                                                                        |
| <b><math>\tau_1</math></b>          | 0.41                                                   | 1.83                                                        | 3.28                                                                        |
| <b>A<sub>2</sub></b>                | 0.19                                                   | 0.18                                                        | 1.05                                                                        |
| <b><math>\tau_2</math></b>          | 0.28                                                   | 1.75                                                        | 1.98                                                                        |
| <b>Avg lifetime (ns)</b>            | 0.32                                                   | 1.80                                                        | 2.33                                                                        |

## 16. Calculation of $\eta_{inj}$ and $\eta_{sep}$ values

The  $J_{abs}$  (the photocurrent density achievable assuming 100% absorbed photon-to-current conversion efficiency for photons) was calculated by the solar spectral irradiance at AM 1.5G ( $W \cdot m^{-2} \cdot nm^{-1}$ , ASTM G173–03) which is first converted to solar photocurrents vs. wavelength ( $A \cdot m^{-2} \cdot nm^{-1}$ ) assuming 100% IPCE for photons. Further, the solar photocurrents are multiplied by the light-harvesting efficiency (LHE) at each wavelength. By adding these products up,  $J_{abs}$  for pure  $\alpha\text{-Fe}_2\text{O}_3$ , 0.5%W: $\alpha\text{-Fe}_2\text{O}_3$  and 0.5%W: $\alpha\text{-Fe}_2\text{O}_3/\text{MoS}_2$  is calculated to be 9.1, 7.87 and 7.56  $mA/cm^2$ . Further, charge separation and injection efficiencies were measured using a 0.5 M  $H_2O_2$  hole scavenger added to 1 M NaOH electrolyte solution <sup>4, 5</sup>.

The water-splitting photocurrent ( $J_{H_2O}$ ) is a product of the rate of photon absorption expressed as a current density ( $J_{abs}$ ) and the highest  $J_{abs}$ , can be calculated by the following equations S8 and S9 <sup>6</sup>:

$$J_{abs} = \int_{200nm}^{800nm} \frac{\lambda}{1240} \times \eta_{LHE}(\lambda) \times AM1.5\psi(\lambda) d\lambda \quad (S8)$$

$$\eta_{LHE}(\lambda) = 1 - 10^{-A(\lambda)} \quad (S9)$$

Where  $\eta_{LEH}(\lambda)$ ,  $AM\ 1.5\psi(\lambda)$ , and  $A(\lambda)$  refer to the light-harvesting efficiency, AM 1.5 simulated solar spectral irradiance, and absorbance at a specific wavelength, respectively. Furthermore, the charge separation efficiency of the photogenerated carriers ( $\eta_{sep}$ ), and the charge injection efficiency to the electrolyte ( $\eta_{inj}$ ) are calculated by equations S10, S11, and S12 under different applied biases using a widely accepted hole scavenger approach<sup>7</sup>.

$$\eta_{inj} = J_{H_2O} / J_{H_2O_2} \quad (S10)$$

$$\eta_{sep} = J_{H_2O_2} / J_{abs} \quad (S11)$$

$$J_{H_2O} = J_{abs} \times \eta_{sep} \times \eta_{inj} \quad (S12)$$

Where  $J_{H_2O}$  and  $J_{H_2O_2}$  refer to the photocurrent density measured in the electrolytes of 1 M NaOH and 1 M NaOH + 0.5 M  $H_2O_2$ , respectively.

## 17. Energy band diagram from UPS

Energies of the Fermi levels ( $E_F$ ) and the valence band maxima ( $E_{VBM}$ ) retrieved from ultraviolet photoelectron spectroscopy (UPS) spectra show in Fig. S13. The work function ( $\Phi$ ) gives the energy of the Fermi level with respect to the vacuum level and is calculated with Eq. (S13):

$$\Phi = h\nu - E_{\text{highcutoff}}, (h\nu \approx 21.22 \text{ eV}) \quad (\text{S13})$$

$|E_{\text{VBM}}|$  is calculated with Eq. (S14):

$$|E_{\text{VBM}}| = h\nu - (E_{\text{highcutoff}} - E_{\text{lowcutoff}}) \quad (\text{S14})$$

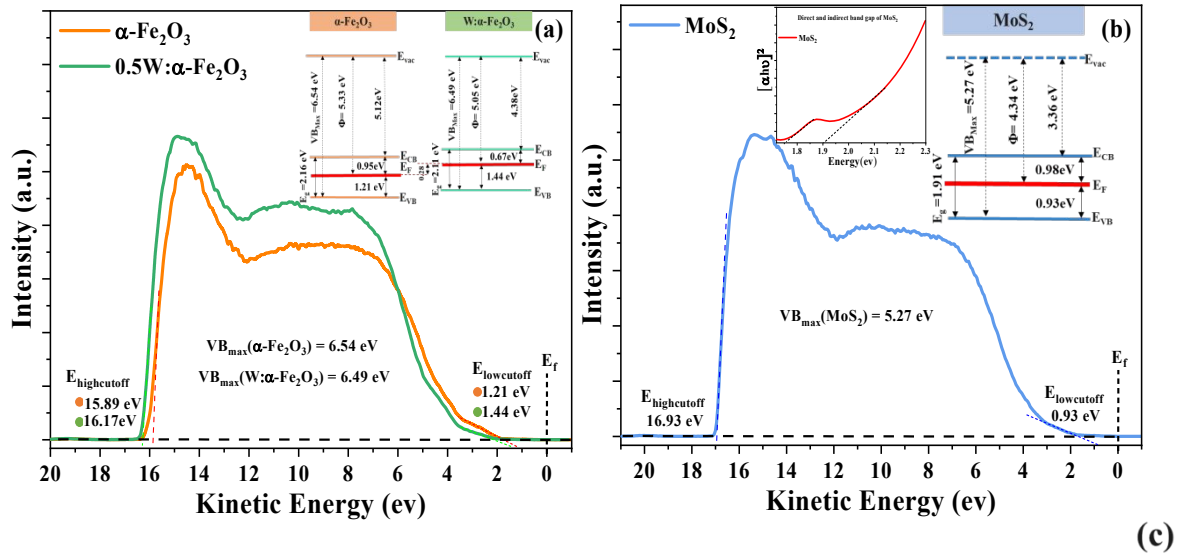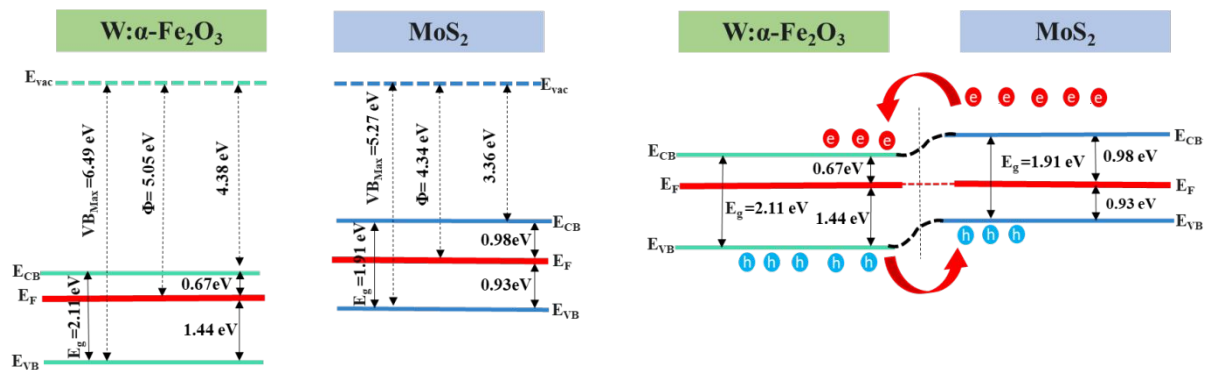

Fig. S13. UPS and work function of (a) pure hematite and 0.5W doped , (b) MoS<sub>2</sub>, and (c) energy band diagram of the heterojunction.

## 18. Calculation of the geometry for nanorods

In the based  $\alpha\text{-Fe}_2\text{O}_3$  nanorods structures, a circular depletion layer will grow from the surface towards the center of the rod at changing bias potential, and the geometry may represent significant changes with respect to Eq.(S4) that we considered in the section 10. Each nanorod is described as a cylinder of radius  $R$  with axial symmetry and donor density  $N_D$ . The Poisson equation is solved in the depletion approximation for the voltage  $V$ . In Eq. (S15) <sup>8</sup>,

$$\frac{1}{r} \frac{\partial}{\partial r} \left( r \frac{\partial V}{\partial r} \right) = - \frac{q}{\epsilon_0 \epsilon_r} N_D \quad (\text{S15})$$

$\epsilon_r$  is the dielectric constant of the  $\alpha\text{-Fe}_2\text{O}_3$  nanorods,  $\epsilon_0$  is the dielectric constant,  $N_D$  is the donor concentration per unit volume ( $\text{cm}^3$ ), and  $q$  is the positive elementary charge. The central zone of the cylinder is a neutral region of electron density with radius  $x$ , and the surface  $x \leq r \leq R$  is a region of positive space charge  $qN_D$ . The voltage in the quasineutral region  $V_{sc}$ , that coincides with the total voltage drop across the barrier, is estimated by Eq. (S16)<sup>8</sup>:

$$V_{sc} = - \frac{N_D}{2\epsilon_0 \epsilon_r} q \left( \frac{1}{2} (R^2 - x^2) + R^2 \ln\left(\frac{x}{R}\right) \right) \quad (\text{S16})$$

Estimated of different quantities for nanorods of radius  $R$  and length around 42 and 120 (for 0.5%W: $\alpha\text{-Fe}_2\text{O}_3/\text{MoS}_2$  150 nm) from the SEM images, respectively. Radius of the neutral region vs. the potential drop across the depletion layer was calculated for pure  $\alpha\text{-Fe}_2\text{O}_3$ , 0.5%W: $\alpha\text{-Fe}_2\text{O}_3$  and 0.5%W: $\alpha\text{-Fe}_2\text{O}_3/\text{MoS}_2$  samples by using the Mott-Schottky data and above equations that shows in Fig. S14.

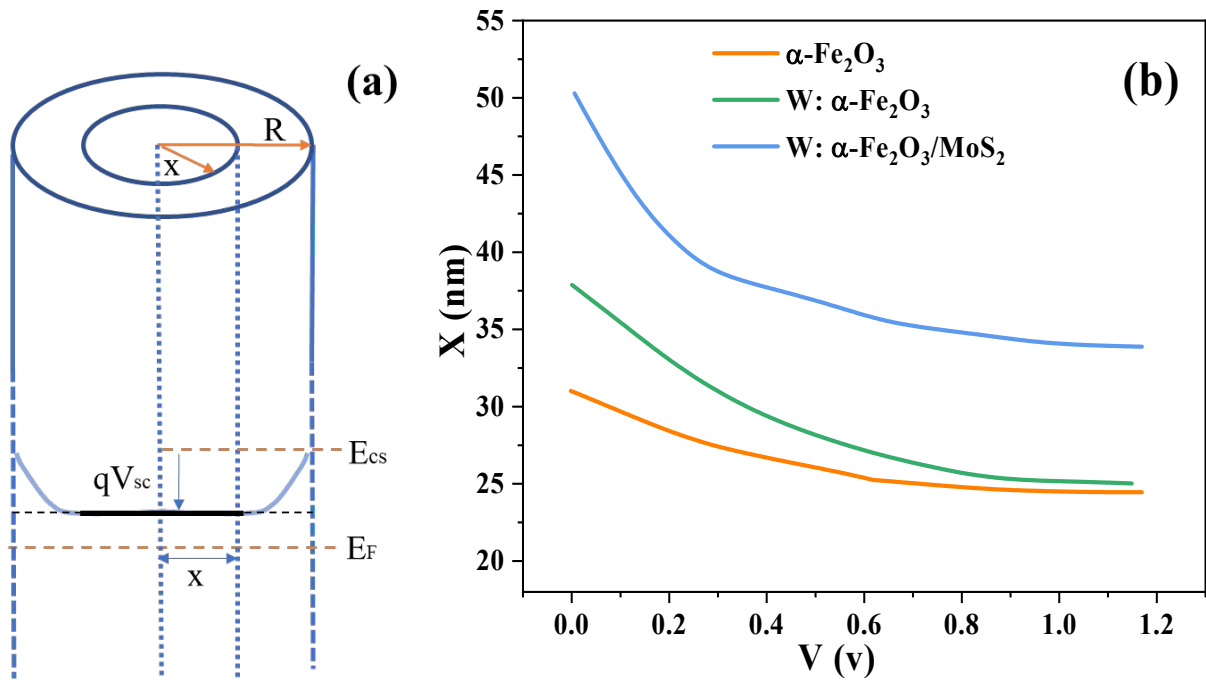

Fig. S14. (a) Schematic of the radial direction of a nanorod indicating the depletion layer at the surface and the quasineutral region of radius  $x$  in the center. (b) Radius of the neutral region vs barrier voltage for pure  $\alpha\text{-Fe}_2\text{O}_3$ , 0.5%W: $\alpha\text{-Fe}_2\text{O}_3$  and 0.5%W: $\alpha\text{-Fe}_2\text{O}_3/\text{MoS}_2$  electrodes.

## 19. Hydrogen and Oxygen Evolution Measurement:

For overall water splitting of  $\alpha\text{-Fe}_2\text{O}_3$ ,  $0.5\text{W}:\alpha\text{-Fe}_2\text{O}_3$  and  $0.5\text{W}\alpha\text{-Fe}_2\text{O}_3/\text{MoS}_2$  photoanodes was evaluated by measuring the  $\text{H}_2$  and  $\text{O}_2$  evolution at 1.23 V versus RHE under  $100\text{ mW.cm}^{-2}$  irradiations in 1M of NaOH electrolyte. The produced hydrogen and oxygen gas amounts were measured using the gas chromatography (GC). Before starting the water splitting reaction nitrogen gas was purged into cell for 2 h to remove the air remaining in the reaction vessel. The light source was turned on and the amounts of evolved oxygen and hydrogen were measured by a tight syringe every 20 min using a gas chromatograph for 2h. The gas samples were injected in the GC, and the resulting peak areas ( $\text{AreaH}_2$ ,  $\text{AreaO}_2$ ) were recorded. The evolved hydrogen-oxygen gases were calculated according to the following formula<sup>9, 10</sup>:

$$\text{H}_2(\text{or O}_2)\mu\text{mol.cm}^{-2} = \left( \frac{\text{Area of H}_2(\text{or O}_2)\text{peak}}{\text{Slope of calibration curve}} \right) \times (\text{Head space volume}) \times \left( \frac{1\text{mol}}{24.2\text{ L}} \right) \quad (\text{S17})$$

The detailed calculation process for the Faradaic efficiency was shown as following:

$$\text{Faradic efficiency} = \text{Actual photocurrent density} / \text{Theoretical photocurrent density} \quad (\text{S18})$$

$$\text{Actual photocurrent density} = N \times n\text{H}_2/\text{O}_2 \times F \quad (\text{S19})$$

F is the Faraday constant which is  $0.096487\text{ C}/\mu\text{mol}$ .  $n\text{H}_2/\text{O}_2 (\mu\text{mol})$  is amount of  $\text{H}_2$  or  $\text{O}_2$  evolution determined by gas chromatography. N is number of electrons needed to evolve one molecule of  $\text{H}_2$  or  $\text{O}_2$ . It is assumed that 2 electrons are needed to produce one molecule of  $\text{H}_2$ , and 4 electrons are needed for one molecule of  $\text{O}_2$ .

$$\text{Theoretical photocurrent density} = Q = I \times t \quad (\text{S20})$$

Q is quantity of charge (electricity) in coulombs (C). I is current in amperes (amps, A) and t is time (seconds).



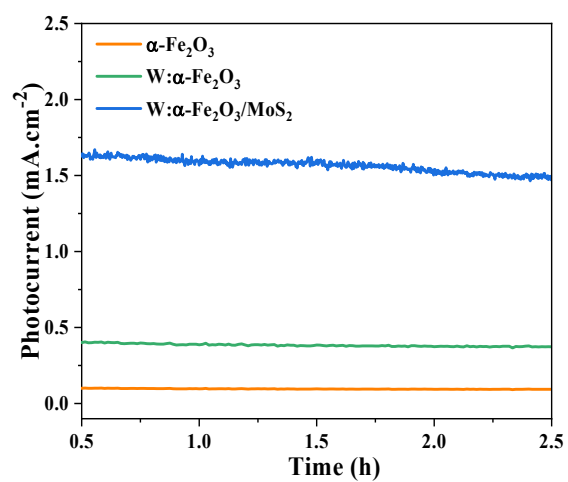

Fig.S15. photocurrent stability at 1.23 V (vs. RHE) for pure  $\alpha\text{-Fe}_2\text{O}_3$ , 0.5W: $\alpha\text{-Fe}_2\text{O}_3$ , and 0.5W: $\alpha\text{-Fe}_2\text{O}_3/\text{MoS}_2$  under 100 mWcm<sup>-2</sup> illumination. The electrolyte was a 1 M NaOH.

## 20. Some of the recent reported doped hematite photoanodes with/without heterojunction

Table S4. Recently reported doped hematite photoanodes with/without heterojunction or cocatalysts

| Photoanode                                                                        | Conditions                                                                   | Photocurrent density<br>(1.23 V vs RHE) | Reference            |
|-----------------------------------------------------------------------------------|------------------------------------------------------------------------------|-----------------------------------------|----------------------|
| Ti-Fe <sub>2</sub> O <sub>3</sub> /10-MoS <sub>x</sub>                            | 1 M NaOH<br>AM 1.5G (100 mW.cm <sup>-2</sup> )                               | ~1.7 mA.cm <sup>-2</sup>                | (2015) <sup>11</sup> |
| Dual-regrowth Fe <sub>2</sub> O <sub>3</sub> /with NiFeOx                         | 0.5 M Phosphate solution<br>AM 1.5G (100 mW.cm <sup>-2</sup> )               | ~1.3 mA.cm <sup>-2</sup>                | (2015) <sup>12</sup> |
| SnO <sub>2</sub> -SiO <sub>x</sub> /Ti:Fe <sub>2</sub> O <sub>3</sub> /with FeOOH | 1 M NaOH<br>AM 1.5G (100 mW.cm <sup>-2</sup> )                               | ~1.54 mA.cm <sup>-2</sup>               | (2016) <sup>13</sup> |
| W-Fe <sub>2</sub> O <sub>3</sub>                                                  | 1 M NaOH<br>AM 1.5G (100 mW.cm <sup>-2</sup> )                               | ~0.27 mA.cm <sup>-2</sup>               | (2016) <sup>14</sup> |
| Ti:Fe <sub>2</sub> O <sub>3</sub> /NiPi                                           | 0.25 M Na <sub>3</sub> PO <sub>4</sub><br>AM 1.5G (100 mW.cm <sup>-2</sup> ) | ~1.3 mA.cm <sup>-2</sup>                | (2017) <sup>15</sup> |
| Fe <sub>2</sub> O <sub>3</sub> /with F:FeOOH/FeNiOOH                              | 1 M NaOH<br>AM 1.5G (100 mW.cm <sup>-2</sup> )                               | ~1.05 mA.cm <sup>-2</sup>               | (2018) <sup>16</sup> |
| α-Fe <sub>2</sub> O <sub>3</sub> /RGO/Ag                                          | 1 M KOH<br>AM 1.5G (100 mW.cm <sup>-2</sup> )                                | ~0.72 mA.cm <sup>-2</sup>               | (2018) <sup>17</sup> |
| P:Fe <sub>2</sub> O <sub>3</sub> /MnO <sub>2</sub>                                | 1 M KOH<br>AM 1.5G (100 mW.cm <sup>-2</sup> )                                | ~1.65 mA.cm <sup>-2</sup>               | (2018) <sup>18</sup> |
| P-Fe <sub>2</sub> O <sub>3</sub> /Ce-Pi                                           | 1 M NaOH<br>AM 1.5G (100 mW.cm <sup>-2</sup> )                               | ~1.24 mA.cm <sup>-2</sup>               | (2019) <sup>19</sup> |
| Mn:Fe <sub>2</sub> O <sub>3</sub> /Ti:Fe <sub>2</sub> O <sub>3</sub>              | 1 M NaOH<br>AM 1.5G (100 mW.cm <sup>-2</sup> )                               | ~1.2 mA.cm <sup>-2</sup>                | (2020) <sup>20</sup> |
| Ti-Co-MOF (ZIF-67) on Fe <sub>2</sub> O <sub>3</sub>                              | 1 M KOH<br>AM 1.5G (100 mW.cm <sup>-2</sup> )                                | ~1 mA.cm <sup>-2</sup>                  | (2020) <sup>21</sup> |
| α-Fe <sub>2</sub> O <sub>3</sub> /MoS <sub>2</sub>                                | 1 M KOH<br>AM 1.5G (100 mW.cm <sup>-2</sup> )                                | ~0.8 mA.cm <sup>-2</sup>                | (2021) <sup>22</sup> |
| <b>0.5%W:α-Fe<sub>2</sub>O<sub>3</sub>/MoS<sub>2</sub></b>                        | 1 M NaOH<br>AM 1.5G (100 mW.cm <sup>-2</sup> )                               | <b>~1.83 mA.cm<sup>-2</sup></b>         | <b>This Work</b>     |

## Reference:

1. Jubu, P. R.; Yam, F. K.; Igba, V. M.; Beh, K. P., Tauc-plot scale and extrapolation effect on bandgap estimation from UV-vis-NIR data – A case study of  $\beta$ -Ga<sub>2</sub>O<sub>3</sub>. *J. Solid State Chem.* **2020**, *290*, 121576.
2. Bhat, S. S.; Pawar, S. A.; Potphode, D.; Moon, C.-K.; Suh, J. M.; Kim, C.; Choi, S.; Patil, D. S.; Kim, J.-J.; Shin, J. C. J. A. C. B. E., Substantially enhanced photoelectrochemical performance of TiO<sub>2</sub> nanorods/CdS nanocrystals heterojunction photoanode decorated with MoS<sub>2</sub> nanosheets. **2019**, *259*, 118102.
3. Guo, Y.; Liu, T.; Wang, N.; Luo, Q.; Lin, H.; Li, J.; Jiang, Q.; Wu, L.; Guo, Z., Ni-doped  $\alpha$ -Fe<sub>2</sub>O<sub>3</sub> as electron transporting material for planar heterojunction perovskite solar cells with improved efficiency, reduced hysteresis and ultraviolet stability. *Nano Energy* **2017**, *38*, 193-200.
4. Dotan, H.; Sivula, K.; Grätzel, M.; Rothschild, A.; Warren, S. C., Probing the photoelectrochemical properties of hematite ( $\alpha$ -Fe<sub>2</sub>O<sub>3</sub>) electrodes using hydrogen peroxide as a hole scavenger. *Energy & Environmental Science* **2011**, *4* (3), 958-964.
5. Zhang, K.; Ma, M.; Li, P.; Wang, D. H.; Park, J. H., Water Splitting Progress in Tandem Devices: Moving Photolysis beyond Electrolysis. *Advanced Energy Materials* **2016**, *6* (15), 1600602.
6. Bassi, P. S.; Antony, R. P.; Boix, P. P.; Fang, Y.; Barber, J.; Wong, L. H., Crystalline Fe<sub>2</sub>O<sub>3</sub>/Fe<sub>2</sub>TiO<sub>5</sub> heterojunction nanorods with efficient charge separation and hole injection as photoanode for solar water oxidation. *Nano Energy* **2016**, *22*, 310-318.
7. Lei, B.; Xu, D.; Wei, B.; Xie, T.; Xiao, C.; Jin, W.; Xu, L., In Situ Synthesis of  $\alpha$ -Fe<sub>2</sub>O<sub>3</sub>/Fe<sub>3</sub>O<sub>4</sub> Heterojunction Photoanode via Fast Flame Annealing for Enhanced Charge Separation and Water Oxidation. *ACS Applied Materials & Interfaces* **2021**, *13* (3), 4785-4795.
8. Mora-Seró, I.; Fabregat-Santiago, F.; Denier, B.; Bisquert, J.; Tena-Zaera, R.; Elias, J.; Lévy-Clément, C., Determination of carrier density of ZnO nanowires by electrochemical techniques. *Applied Physics Letters* **2006**, *89* (20), 203117.
9. Tayebi, M.; Tayyebi, A.; Lee, B.-K.; Lee, C.-H.; Lim, D.-H., The effect of silver doping on photoelectrochemical (PEC) properties of bismuth vanadate for hydrogen production. *Sol. Energy Mater. Sol. Cells* **2019**, *200*, 109943.
10. Tayebi, M.; Lee, B.-K., The effects of W/Mo-co-doped BiVO<sub>4</sub> photoanodes for improving photoelectrochemical water splitting performance. *Catalysis Today* **2021**, *361*, 183-190.
11. Ahn, H.-J.; Yoon, K.-Y.; Kwak, M.-J.; Lee, J.-S.; Thiagarajan, P.; Jang, J.-H., MoS<sub>x</sub> supported hematite with enhanced photoelectrochemical performance. *Journal of Materials Chemistry A* **2015**, *3* (43), 21444-21450.
12. Jang, J.-W.; Du, C.; Ye, Y.; Lin, Y.; Yao, X.; Thorne, J.; Liu, E.; McMahon, G.; Zhu, J.; Javey, A.; Guo, J.; Wang, D., Enabling unassisted solar water splitting by iron oxide and silicon. *Nature Communications* **2015**, *6* (1), 7447.
13. Cho, I. S.; Han, H. S.; Logar, M.; Park, J.; Zheng, X., Enhancing Low-Bias Performance of Hematite Photoanodes for Solar Water Splitting by Simultaneous Reduction of Bulk, Interface, and Surface Recombination Pathways. *Advanced Energy Materials* **2016**, *6* (4), 1501840.
14. Su, J.; Wang, J.; Liu, C.; Feng, B.; Chen, Y.; Guo, L., On the role of metal atom doping in hematite for improved photoelectrochemical properties: a comparison study. *RSC Advances* **2016**, *6* (104), 101745-101751.
15. Wang, J.; Yang, J.; Zheng, Z.; Lu, T.; Gao, W., The role of thin NiPi film for enhancing solar water splitting performance of Ti doped hematite. *Applied Catalysis B: Environmental* **2017**, *218*, 277-286.

16. Deng, J.; Zhang, Q.; Feng, K.; Lan, H.; Zhong, J.; Chaker, M.; Ma, D., Efficient Photoelectrochemical Water Oxidation on Hematite with Fluorine-Doped FeOOH and FeNiOOH as Dual Cocatalysts. *ChemSusChem* **2018**, *11* (21), 3783-3789.
17. Yu, L.; Zhang, Y.; He, J.; Zhu, H.; Zhou, X.; Li, M.; Yang, Q.; Xu, F., Enhanced photoelectrochemical properties of  $\alpha$ -Fe<sub>2</sub>O<sub>3</sub> nanoarrays for water splitting. *Journal of Alloys and Compounds* **2018**, *753*, 601-606.
18. Rui, Q.; Wang, L.; Zhang, Y.; Feng, C.; Zhang, B.; Fu, S.; Guo, H.; Hu, H.; Bi, Y., Synergistic effects of P-doping and a MnO<sub>2</sub> cocatalyst on Fe<sub>2</sub>O<sub>3</sub> nanorod photoanodes for efficient solar water splitting. *Journal of Materials Chemistry A* **2018**, *6* (16), 7021-7026.
19. Bu, X.; Gao, Y.; Zhang, S.; Tian, Y., Amorphous cerium phosphate on P-doped Fe<sub>2</sub>O<sub>3</sub> nanosheets for efficient photoelectrochemical water oxidation. *Chemical Engineering Journal* **2019**, *355*, 910-919.
20. Tao, S.-M.; Lin, L.-Y., Design of efficient Mn-doped  $\alpha$ -Fe<sub>2</sub>O<sub>3</sub>/Ti-doped  $\alpha$ -Fe<sub>2</sub>O<sub>3</sub> homojunction for catalyzing photoelectrochemical water splitting. *International Journal of Hydrogen Energy* **2020**, *45* (11), 6487-6499.
21. Li, W.; Wang, K.; Yang, X.; Zhan, F.; Wang, Y.; Liu, M.; Qiu, X.; Li, J.; Zhan, J.; Li, Q.; Liu, Y., Surfactant-assisted controlled synthesis of a metal-organic framework on Fe<sub>2</sub>O<sub>3</sub> nanorod for boosted photoelectrochemical water oxidation. *Chemical Engineering Journal* **2020**, *379*, 122256.
22. Masoumi, Z.; Tayebi, M.; Lee, B.-K., Ultrasonication-assisted liquid-phase exfoliation enhances photoelectrochemical performance in  $\alpha$ -Fe<sub>2</sub>O<sub>3</sub>/MoS<sub>2</sub> photoanode. *Ultrasonics Sonochemistry* **2021**, *72*, 105403.
